# Supplementary material for: Inhibition of SRP-dependent protein secretion by the bacterial alarmone (p)ppGpp
Source: PubMed Central journal article supplement (PMC8881573; doi:10.1038/s41467-022-28675-0), 2022-02-25
Supplement: 41467_2022_28675_MOESM1_ESM.pdf [file 41467_2022_28675_MOESM1_ESM.pdf]

## *Supplementary Materials for:*

### **Inhibition of SRP-dependent protein secretion by the bacterial alarmone (p)ppGpp**

Laura Czech<sup>\*1,†</sup>, Christopher-Nils Mais<sup>1,†</sup>, Hanna Kratzat<sup>2</sup>, Pinku Sarmah<sup>3,4</sup>, Pietro Giammarinaro<sup>1</sup>, Sven-Andreas Freibert<sup>5,6</sup>, Hanna Folke Esser<sup>2</sup>, Joanna Musial<sup>2</sup>, Otto Berninghausen<sup>2</sup>, Wieland Steinchen<sup>1</sup>, Roland Beckmann<sup>2</sup>, Hans-Georg Koch<sup>3</sup>, Gert Bange<sup>\*1,7</sup>

<sup>1</sup>Center for Synthetic Microbiology (SYNMIKRO) and Department of Chemistry, Philipps-Universität Marburg; Marburg, Germany.

<sup>2</sup>Gene Center Munich, Department of Biochemistry, Ludwig-Maximilians-Universität, LMU; Munich, Germany.

<sup>3</sup>Institute of Biochemistry and Molecular Biology, Faculty of Medicine, Albert-Ludwigs-Universität Freiburg; Freiburg, Germany.

<sup>4</sup>Faculty of Biology, Albert-Ludwigs-Universität Freiburg; Freiburg, Germany.

<sup>5</sup>Institut für Zytobiologie, Philipps-Universität Marburg; Marburg, Germany.

<sup>6</sup>Core Facility ‘Protein Biochemistry and Spectroscopy’, Philipps-Universität Marburg; Marburg, Germany.

<sup>7</sup>Max-Planck Institute for terrestrial Microbiology; Marburg, Germany.

†These authors contribute equally to this work.

\*Corresponding authors. Email: [laura.czech@staff.uni-marburg.de](mailto:laura.czech@staff.uni-marburg.de), [gert.bange@synmikro.uni-marburg.de](mailto:gert.bange@synmikro.uni-marburg.de)

#### **This PDF file includes:**

Supplementary Figs. 1 to 11  
Supplementary Tables S1 to S4

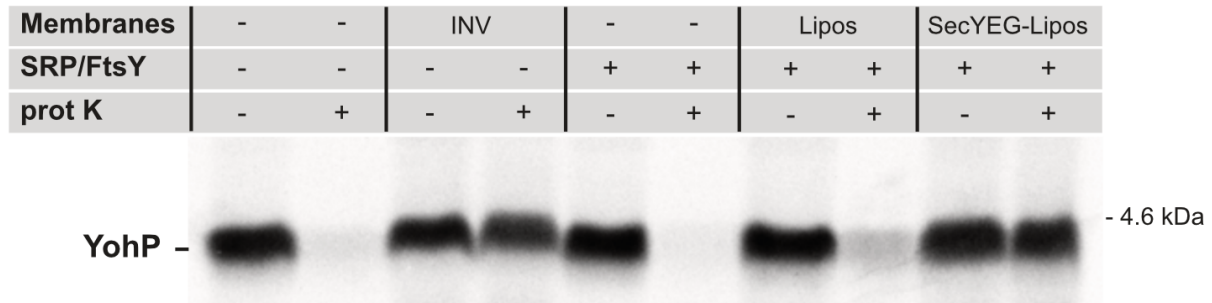

**Supplementary Fig. 1. YohP membrane insertion requires SRP, FtsY and SecYEG.** YohP was *in vitro* synthesized using a purified coupled transcription/translation system (CTF system) and translation was terminated by the addition of chloramphenicol (35 mg ml<sup>-1</sup>). Samples were then centrifuged for removing ribosomes and aggregates; the supernatant was subsequently incubated with either INV-buffer, INV (inverted inner membrane vesicles), liposomes or SecYEG-proteoliposomes for 10 min in the presence of 10 μM GTP. When indicated, SRP and FtsY were present (20 ng μl<sup>-1</sup>, each). Subsequently, one half of the sample was immediately TCA precipitated, while the other half was treated with proteinase K (prot K) before TCA precipitation. Samples were then separated by SDS-PAGE and analyzed by autoradiography. A representative gel of at least three independent experiments is shown.

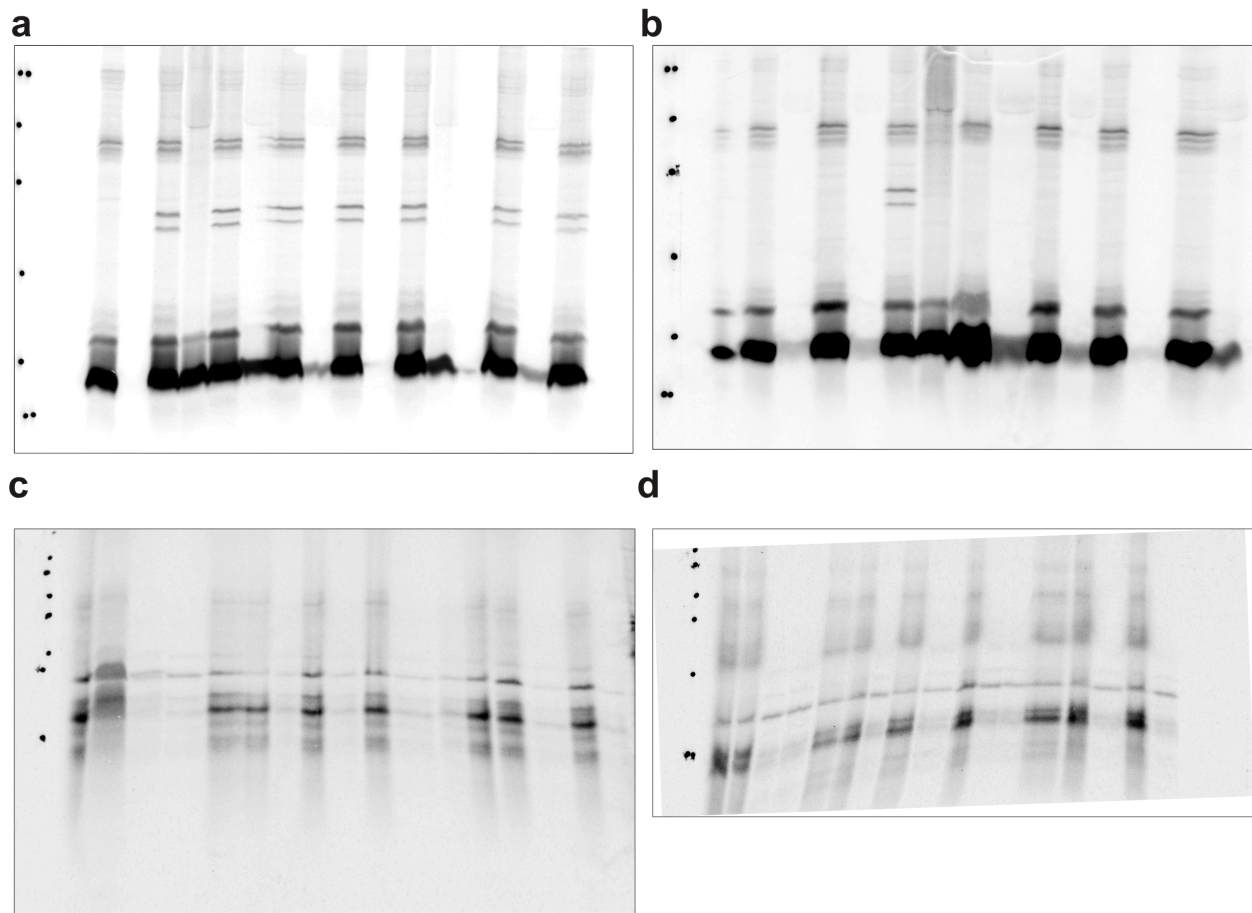

**Supplementary Fig. 2 Uncropped images of main text Figure 1 and 2.** (a) Uncropped image of Figure 1a. (b) Uncropped image of Figure 1c. (c) Uncropped image of Figure 2a. (d) Uncropped image of Figure 2b.

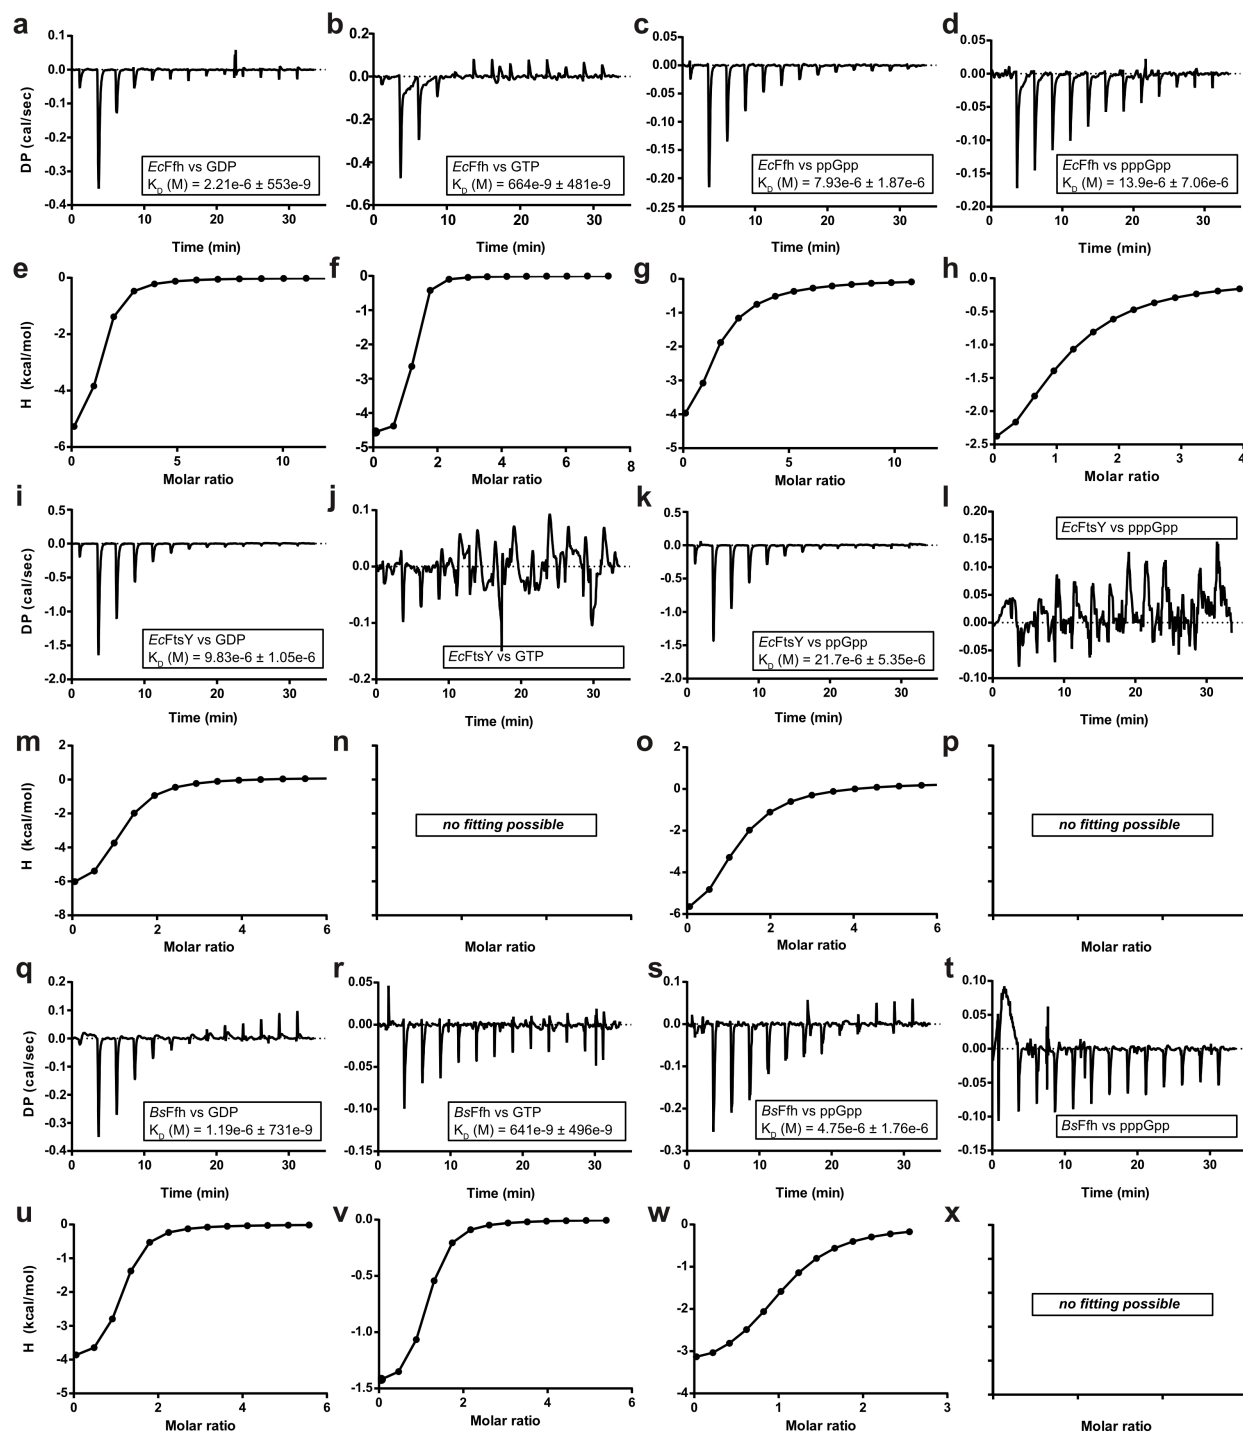

**Supplementary Fig. 3. Ligand binding of Ffh and FtsY NG domains from *E. coli* and Ffh NG domain from *B. subtilis*.** Purified NG domains of (*Ec*)Ffh (a-h), (*Ec*)FtsY (i-p) and (*Bs*)Ffh (q-x) were titrated with GDP, GTP, ppGpp and pppGpp and the binding was assessed by isothermal calorimetry, respectively. Panels a-d, i-l, and q-t show the thermograms for each ITC run, and panels e-h, m-p, and u-x are the resulting fitted plots given as heat versus ligand concentration. DP stands for differential power.

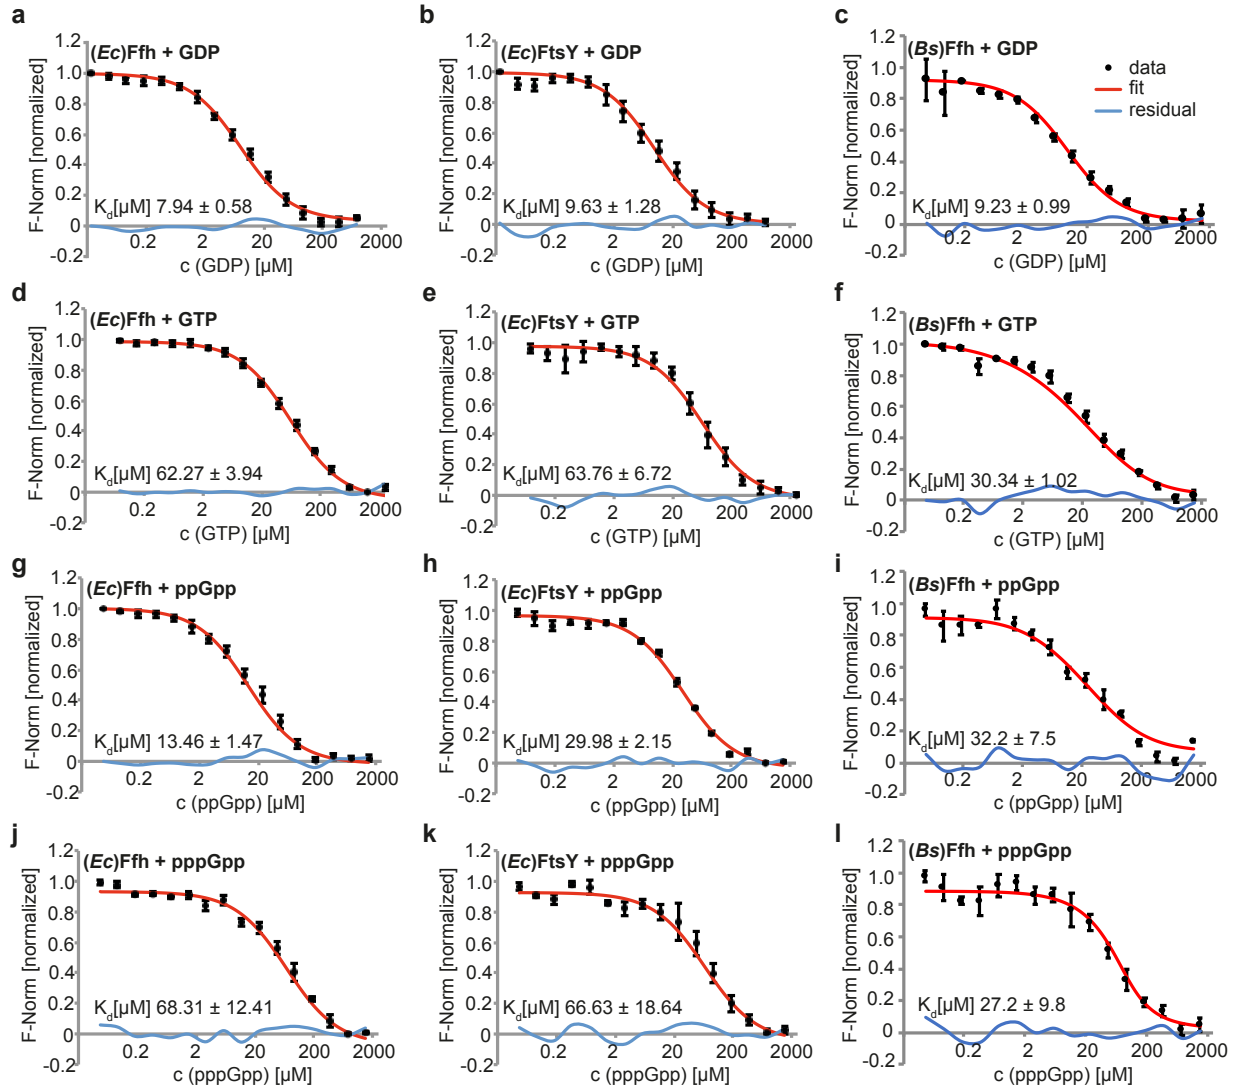

**Supplementary Fig. 4. Ligand binding of Ffh and FtsY NG domains from *E. coli* and Ffh NG domain from *B. subtilis*.** Purified NG domains of (*Ec*)Ffh, (*Ec*)FtsY and (*Bs*)Ffh were incubated with increasing concentrations of (a, b and c) GDP, (d, e and f) GTP, (g, h and i) ppGpp and (j, k and l) pppGpp and the binding was assessed by microscale thermophoresis, respectively. Data are presented as mean values  $\pm$  SD of  $n=2$  biologically independent samples and each three technically independent measurements.

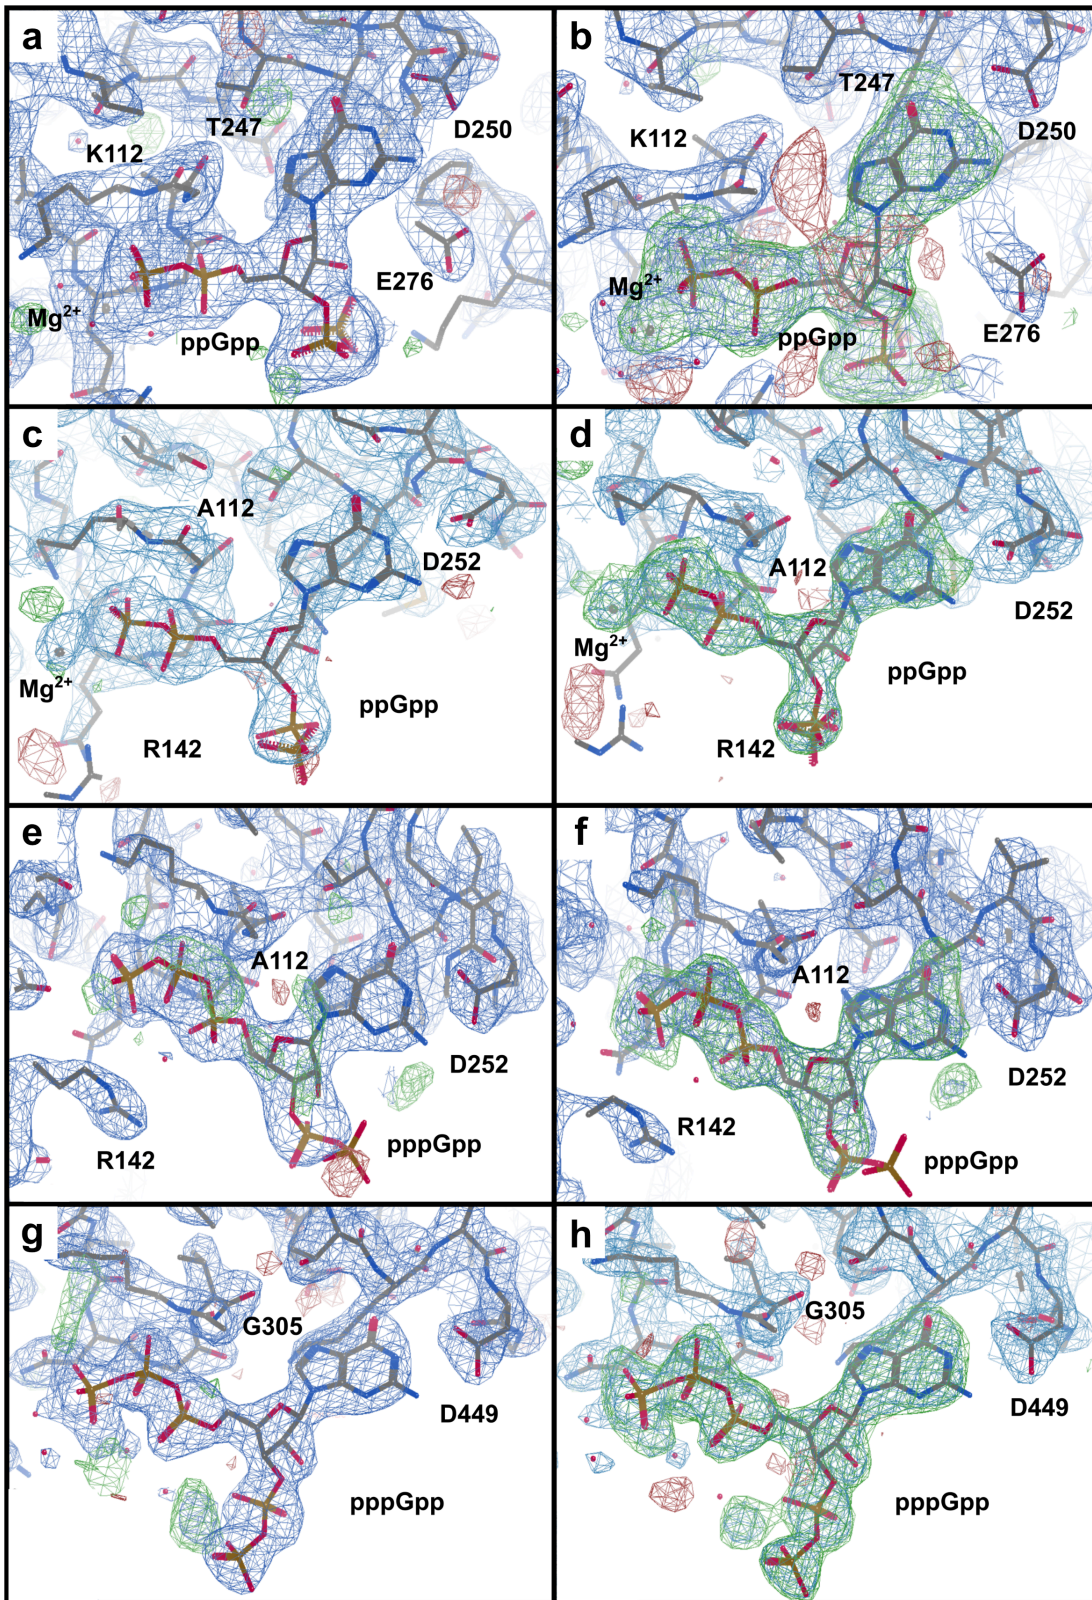

**Supplementary Fig. 5. Substrate coordination in Ffh and FtsY.** (a) The  $2F_{\text{obs}}-F_{\text{calc}}$  electron density after final refinement of (*Bs*)Ffh with ppGpp and  $\text{Mg}^{2+}$  is shown as a blue mesh at  $1.5 \sigma$ .  $F_{\text{obs}}-F_{\text{calc}}$  difference electron density at  $3 \sigma$  is shown as green mesh. Applies to all following densities. (b) Unbiased  $F_{\text{obs}}-F_{\text{calc}}$  difference electron density of (*Bs*)Ffh with ppGpp and  $\text{Mg}^{2+}$ . Bias was removed by refinement prior to incorporation of the ligand. Applies to all following unbiased densities. (c) Electron density after final refinement of (*Ec*)Ffh with ppGpp and  $\text{Mg}^{2+}$ . (d) Unbiased electron density of (*Ec*)Ffh with ppGpp and  $\text{Mg}^{2+}$ . (e) Electron density after final refinement of (*Ec*)Ffh with pppGpp. (f) Unbiased electron density of (*Ec*)Ffh with pppGpp. (g) Electron density after final refinement of (*Ec*)FtsY with ppGpp. (h) Unbiased electron density of (*Ec*)FtsY with pppGpp.

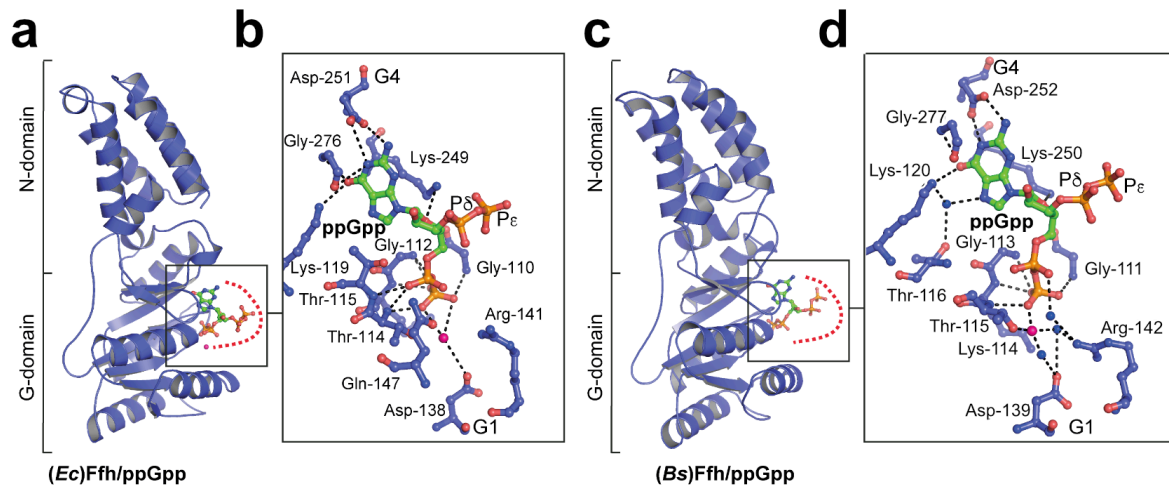

**Supplementary Fig. 6. Overall fold and zoom into the nucleotide binding side of the NG domains of (*Ec*)Ffh and (*Bs*)Ffh both in complex with ppGpp and  $Mg^{2+}$ .** (a and c) Overall fold of the NG domain of (*Ec*)Ffh (a) and (*Bs*)Ffh (c). (b and d) Coordination of the alarmone ppGpp (green) and  $Mg^{2+}$  (pink) within the nucleotide binding side of (*Ec*)Ffh (c) and (*Bs*)Ffh (d). Waters are shown in blue.



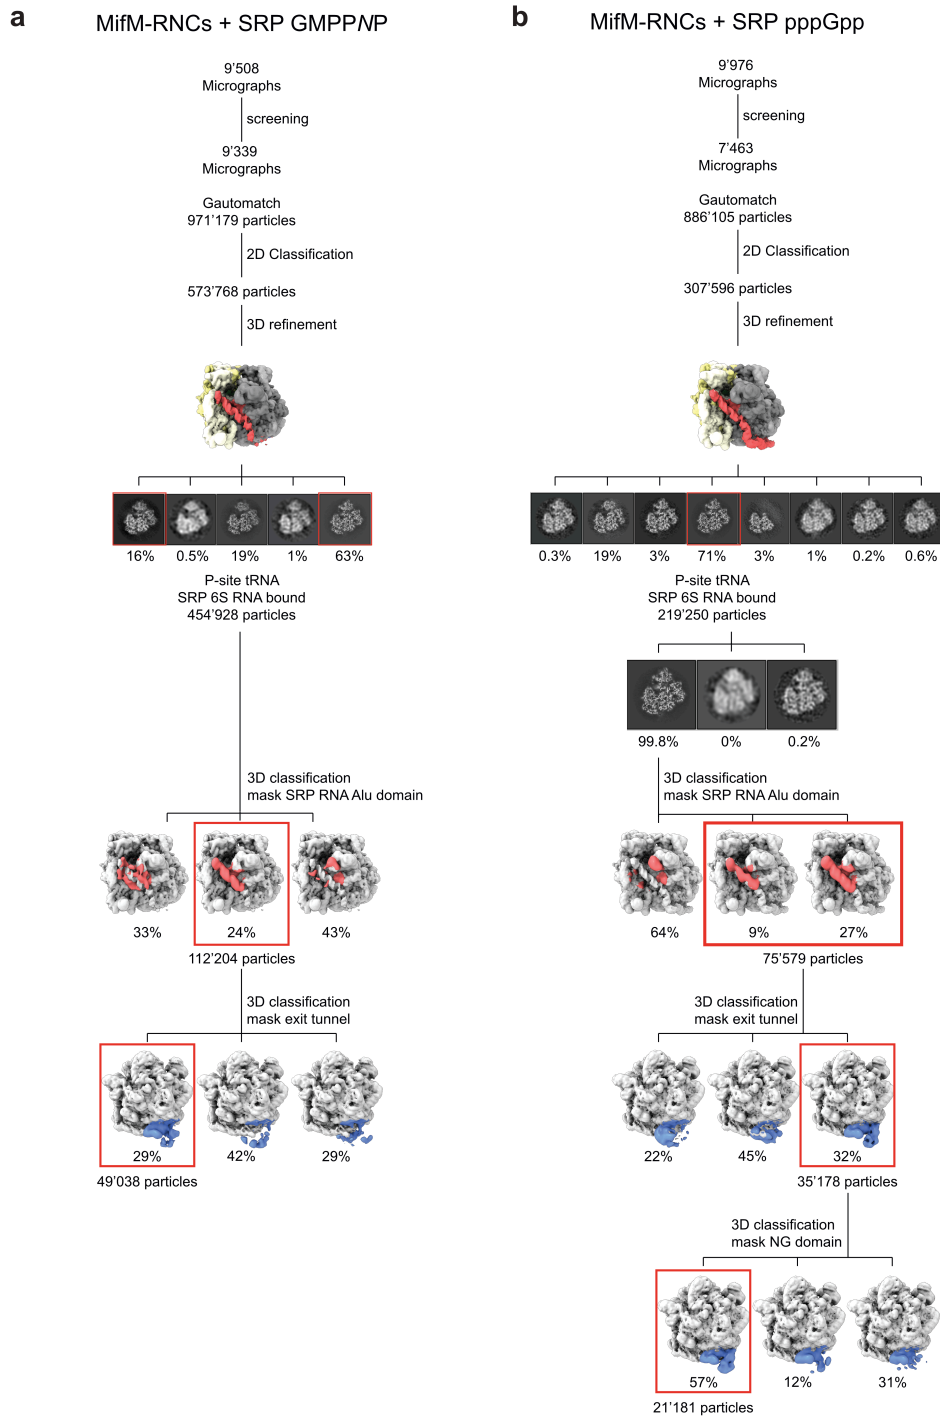

**Supplementary Fig. 7. Sorting schemes of the *B. subtilis* cryo-EM datasets.** Sorting scheme of the dataset of (*Bs*)SRP-bound MifM-stalled RNCs preincubated with GMPPNP (a) and RNCs preincubated with pppGpp (b). In the GPMPNP data set, classification attempts to sort for stable conformations of the NG domain of Ffh were unsuccessful.

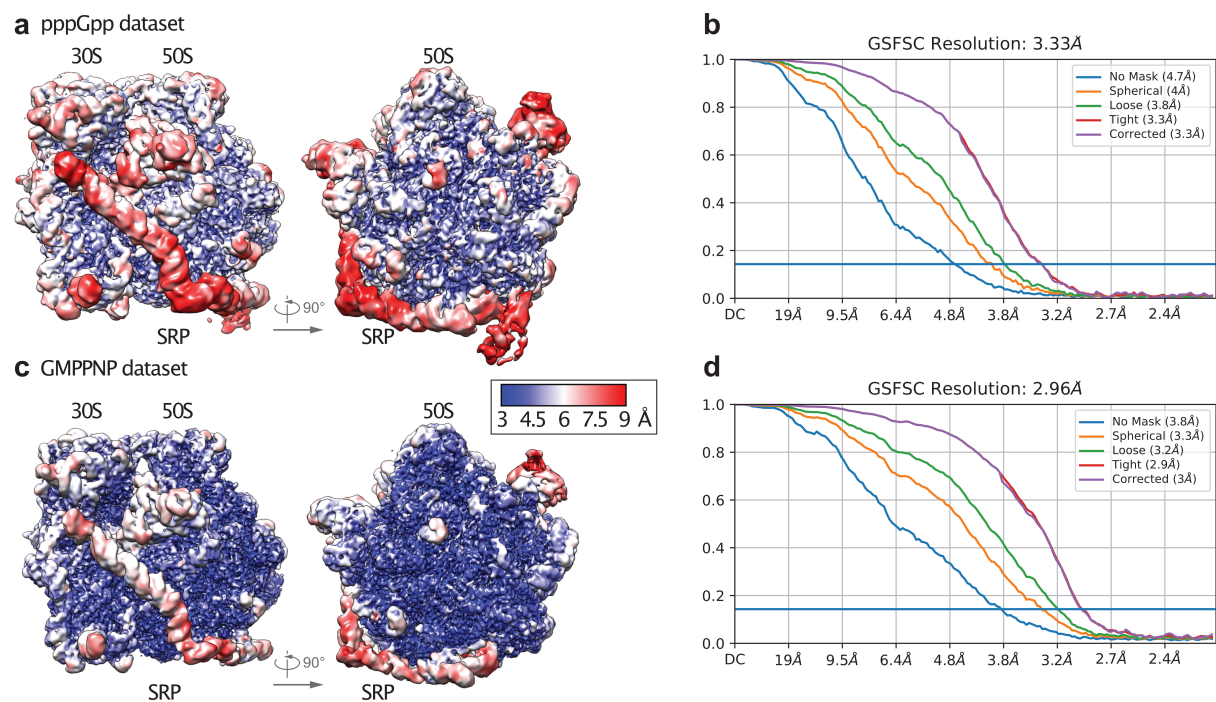

**Supplementary Fig. 8. Resolution of the SRP-RNC complexes.** pppGpp dataset cryo-EM map of (*Bs*)SRP-bound MifM-stalled RNCs filtered and colored at local resolution (a) and the corresponding Gold standard Fourier Shell Correlation (GSFSC) curve from Cryosparc (b). GMPPNP dataset cryo-EM map of (*Bs*)SRP-bound MifM-stalled RNCs filtered and colored at local resolution (c) and the corresponding GSFSC curve from Cryosparc (d).

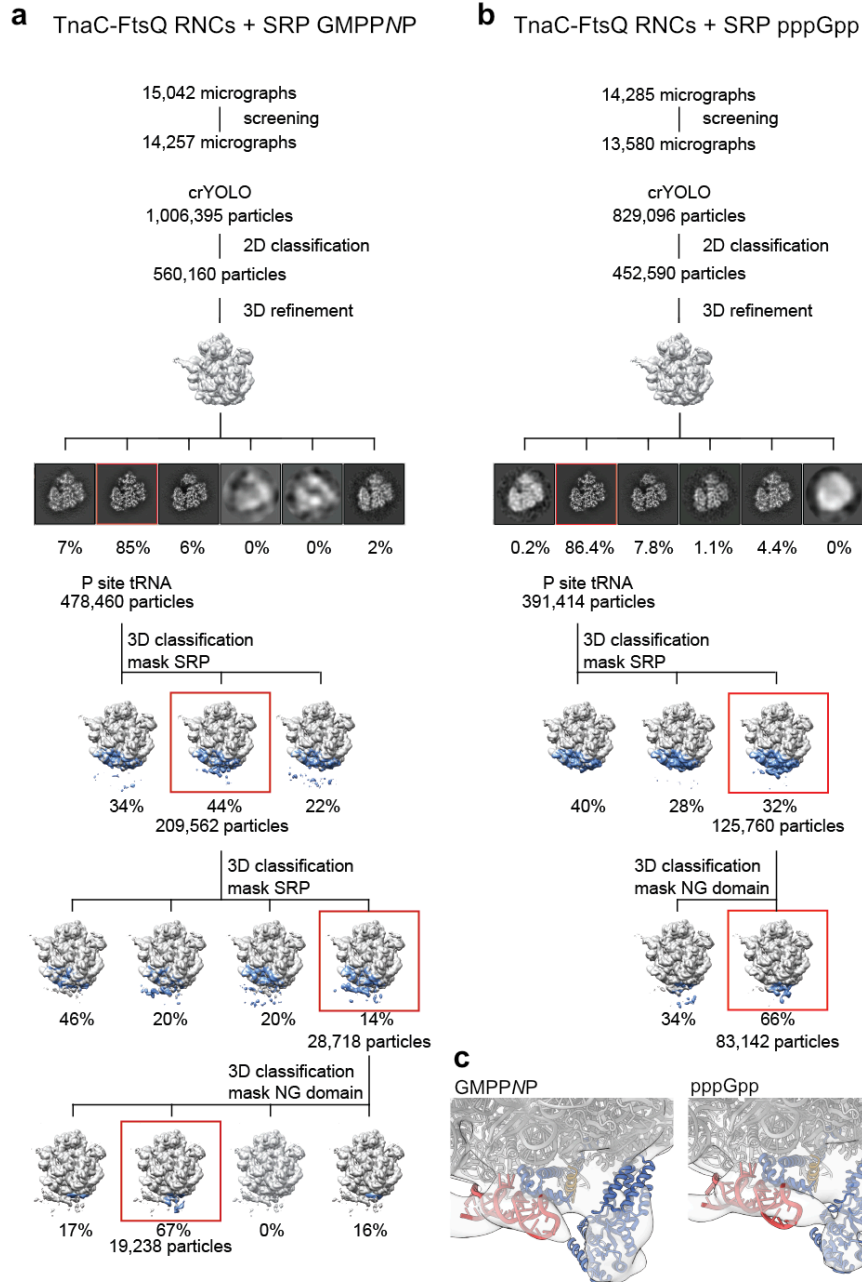

**Supplementary Fig. 9. Sorting scheme of the jointly processed *E. coli* cryo-EM datasets.**

Initial processing of the datasets of (*Ec*)SRP-bound TnaC-stalled RNCs preincubated with GMPPNP (a, left) and RNCs preincubated with pppGpp (b, right). To facilitate an unbiased comparison, the data sets were combined to sort for different conformations of the NG domain of SRP. Afterwards the particles were separated and refined individually. (c) Comparison of a detailed view of SRP bound to *E. coli* RNCs in complex with GMPPNP and pppGpp.

TnaC-FtsQ RNCs + SRP GMPPNP

TnaC-FtsQ RNCs +SRP pppGpp

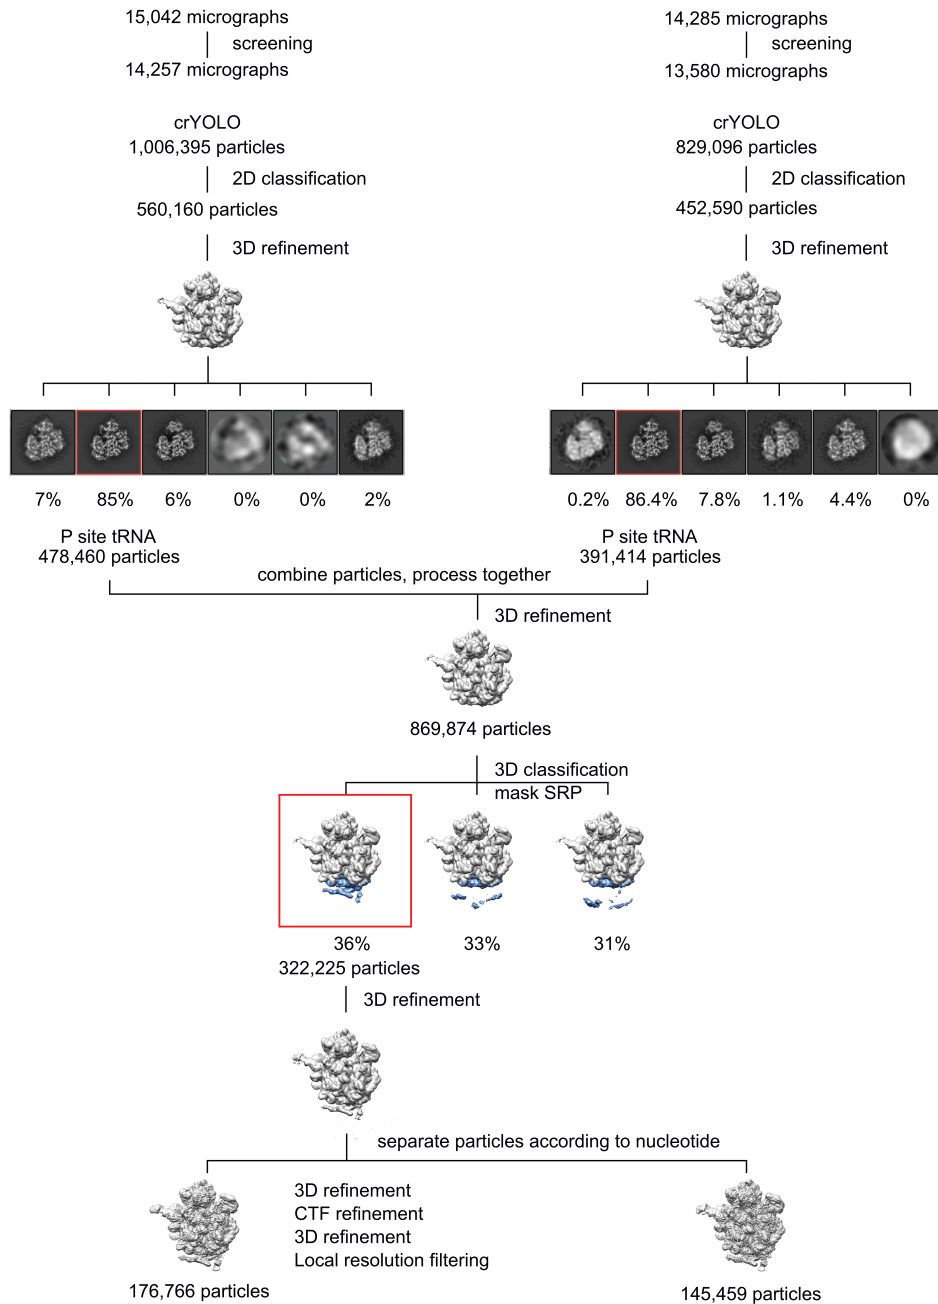

**Supplementary Fig. 10. Sorting schemes of the *E. coli* cryo-EM datasets.** Sorting scheme of the datasets of (*Ec*)SRP-bound TnaC-stalled RNCs preincubated with GMPPNP (left) and RNCs preincubated with pppGpp (right). To avoid differences based on sorting strategies and to facilitate an unbiased comparison, the data sets were combined to sort for different conformations of the NG domain of SRP. Afterwards the particles were separated and refined individually.

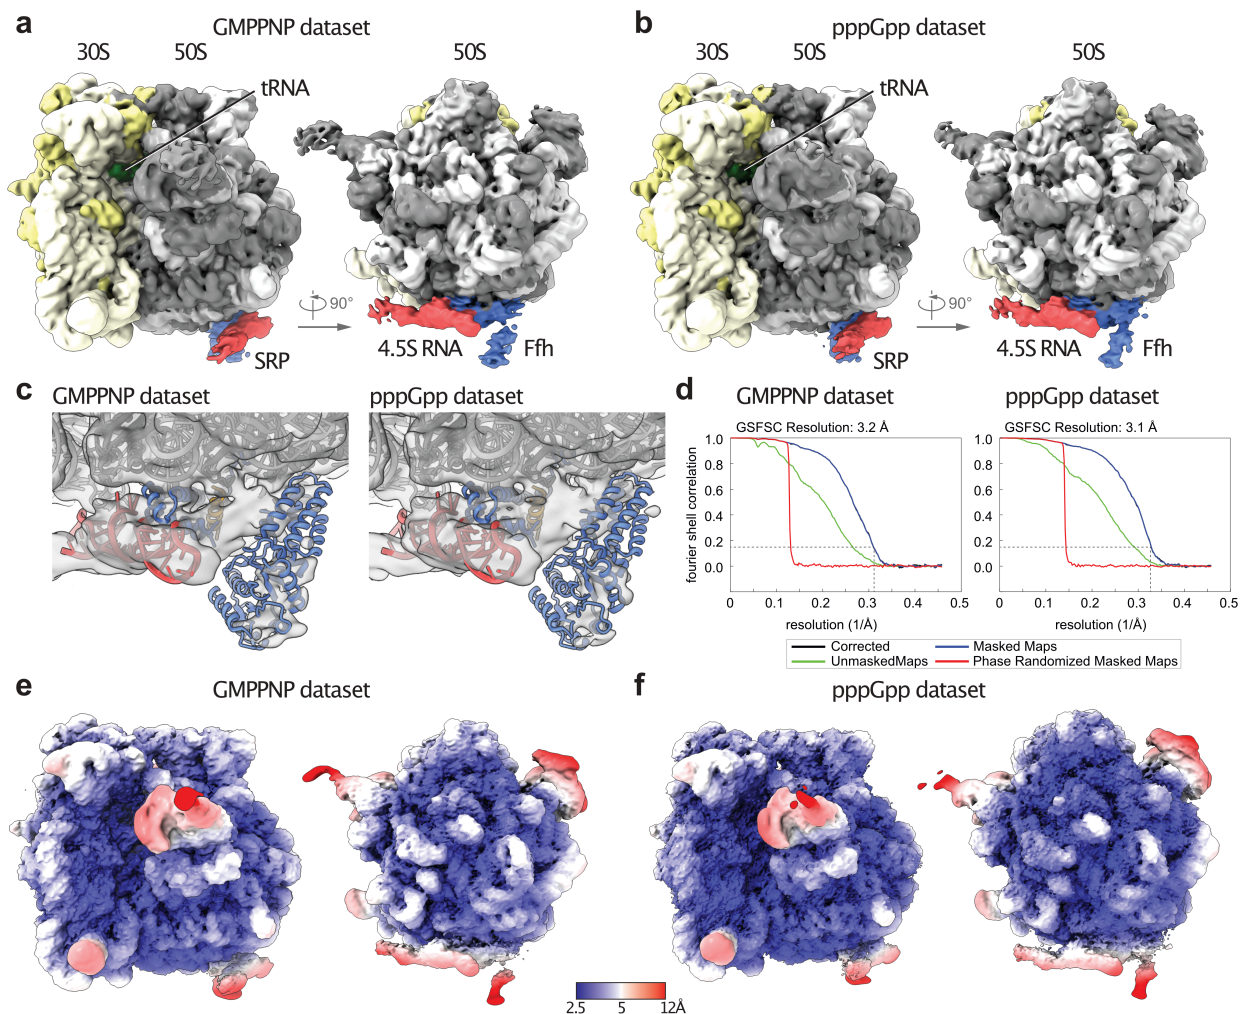

**Supplementary Fig. 11. Cryo-EM structures of *E. coli* SRP-RNC complexes.** GMPPNP dataset cryo-EM map (a) and pppGpp dataset cryo-EM map (b) of (*Ec*)SRP-bound TnaC-stalled RNCs filtered at 8Å with 30S small ribosomal subunit in yellow, 50S large ribosomal subunit in grey, and SRP in red (4.5S RNA) and blue (Ffh). (c) Comparison of Ffh-NG domain cryo-EM densities for the GMPPNP and pppGpp dataset; the fitted model is (*Ec*)SRP-bound RNCs with GMPPNP (PDB 5GAF), which was aligned on the 50S. (d) Gold standard Fourier Shell Correlation (GSFSC) curves of the two final volumes from Relion. (e) GMPPNP dataset cryo-EM map of (*Ec*)SRP-bound TnaC-stalled RNCs filtered and colored at local resolution. (f) pppGpp dataset cryo-EM map of (*Ec*)SRP-bound TnaC-stalled RNCs filtered and colored at local resolution.

**Supplementary Table 1.** Data collection and refinement statistics.

|                                                     | ( <i>Ec</i> )Ffh,<br>pppGpp | ( <i>Ec</i> )FtsY,<br>pppGpp                          | ( <i>Ec</i> )Ffh,<br>ppGpp+Mg <sup>2+</sup> | ( <i>Bs</i> )Ffh,<br>ppGpp+Mg <sup>2+</sup> |
|-----------------------------------------------------|-----------------------------|-------------------------------------------------------|---------------------------------------------|---------------------------------------------|
| <b>Data collection</b>                              |                             |                                                       |                                             |                                             |
| Space group                                         | <i>P</i> 4 <sub>1</sub>     | <i>P</i> 2 <sub>1</sub> 2 <sub>1</sub> 2 <sub>1</sub> | <i>P</i> 12 <sub>1</sub> 1                  | <i>P</i> 4 <sub>1</sub> 2 <sub>1</sub> 2    |
| Cell dimensions                                     |                             |                                                       |                                             |                                             |
|                                                     | 58.06                       | 74.48                                                 | 48.63                                       | 163.28                                      |
| <i>a</i> , <i>b</i> , <i>c</i> (Å)                  | 58.06                       | 90.71                                                 | 38.2                                        | 163.28                                      |
|                                                     | 101.68                      | 106.64                                                | 78.44                                       | 93.47                                       |
|                                                     | 90                          | 90                                                    | 90                                          | 90                                          |
| $\alpha$ , $\beta$ , $\gamma$ (°)                   | 90                          | 90                                                    | 96.273                                      | 90                                          |
|                                                     | 90                          | 90                                                    | 90                                          | 90                                          |
| Wavelength (Å)                                      | 0.976253                    | 0.976253                                              | 0.97626                                     | 0.976253                                    |
| Resolution (Å)                                      | 38.25 - 2.492               | 43.36 - 2.4                                           | 43.26 - 2.803                               | 49.12 - 2.511                               |
|                                                     | (2.581 - 2.492)             | (2.486 - 2.4)                                         | (2.642 - 2.551)                             | (2.601 - 2.511)                             |
| <i>R</i> <sub>merge</sub>                           | 0.0769 (0.4526)             | 0.1867 (1.1)                                          | 0.02444 (0.0704)                            | 0.1376 (3.609)                              |
| <i>I</i> / $\sigma$ <i>I</i>                        | 25.77 (4.74)                | 8.85 (2.81)                                           | 32.05 (12.07)                               | 17.62 (0.99)                                |
| Completeness (%)                                    | 99.40 (95.94)               | 90.78 (99.79)                                         | 97.41 (96.54)                               | 99.90 (99.28)                               |
| Redundancy                                          | 19.2 (14.4)                 | 6.2 (6.6)                                             | 3.4 (3.4)                                   | 25.7 (26.2)                                 |
| <i>CC</i> <sub>1/2</sub>                            | 0.999 (0.969)               | 0.993 (0.782)                                         | 0.999 (0.996)                               | 0.999 (0.488)                               |
| <b>Refinement</b>                                   |                             |                                                       |                                             |                                             |
| Resolution (Å)                                      | 38.25 - 2.492               | 43.36 - 2.4                                           | 43.26 - 2.803                               | 49.12 - 2.511                               |
| No. reflections                                     | 11746 (1115)                | 26244 (2818)                                          | 7078 (697)                                  | 43593 (4268)                                |
| <i>R</i> <sub>work</sub> / <i>R</i> <sub>free</sub> | 0.24/0.27                   | 0.21/0.26                                             | 0.21/0.24                                   | 0.22/0.26                                   |
| No. atoms                                           | 2206                        | 4809                                                  | 2283                                        | 6930                                        |
| Protein                                             | 2152                        | 4642                                                  | 2237                                        | 6803                                        |
| Ligand/ion                                          | 40                          | 80                                                    | 37                                          | 111                                         |
| Water                                               | 14                          | 87                                                    | 9                                           | 16                                          |
| <i>B</i> -factors                                   | 64.34                       | 44.91                                                 | 60.14                                       | 101.23                                      |
| Protein                                             | 64.15                       | 44.76                                                 | 60.22                                       | 101.48                                      |
| Ligand/ion                                          | 76.60                       | 55.57                                                 | 60.59                                       | 91.28                                       |
| Water                                               | 58.18                       | 43.17                                                 | 38.63                                       | 65.86                                       |
| R.m.s. deviations                                   |                             |                                                       |                                             |                                             |
| Bond lengths (Å)                                    | 0.009                       | 0.010                                                 | 0.011                                       | 0.008                                       |
| Bond angles (°)                                     | 1.44                        | 1.30                                                  | 1.56                                        | 1.22                                        |
| Ramachandran                                        |                             |                                                       |                                             |                                             |
| Favored (%)                                         | 97.18                       | 98.67                                                 | 96.92                                       | 97.73                                       |
| Allowed (%)                                         | 2.46                        | 1.33                                                  | 3.08                                        | 2.27                                        |
| Outliers (%)                                        | 0.35                        | 0.00                                                  | 0.00                                        | 0.00                                        |

\*Values in parentheses are for highest-resolution shell.

Data were collected on ID30A-3 (MASSIF-3, ESRF) and P14 (DESY).

**Supplementary Table 2. Data collection and refinement cryo-EM *B. subtilis* (*Bs*) datasets.**

|                                                     | ( <i>Bs</i> ) SRP-RNC (pppGpp)<br>PDB 7O5B EMDB 12734 | ( <i>Bs</i> ) SRP-RNC (GMPPNP)<br>EMDB 12735 |
|-----------------------------------------------------|-------------------------------------------------------|----------------------------------------------|
| <b>Data collection</b>                              |                                                       |                                              |
| Voltage (kV)                                        |                                                       | 300                                          |
| Electron exposure (e <sup>-</sup> /Å <sup>2</sup> ) |                                                       | 25                                           |
| Defocus range (μm)                                  |                                                       | -0.5 to -5                                   |
| Pixel size (Å)                                      |                                                       | 1.059                                        |
| Symmetry imposed                                    |                                                       | C1                                           |
| <b>Refinement</b>                                   |                                                       |                                              |
| Particle images (no.)                               | 21,229                                                | 49,287                                       |
| Map resolution (Å)                                  | 3.33                                                  | 2.96                                         |
| FSC threshold                                       | 0.143                                                 | 0.143                                        |
| Map sharpening B factor (Å <sup>2</sup> )           | -85.7                                                 | -73.5                                        |
| <b>Model composition</b>                            |                                                       |                                              |
| Correlation coefficient (%; Phenix)                 | 0.80                                                  |                                              |
| Models used (PDB codes)                             | 6HA1, 3JW9, 4UE4                                      |                                              |
| Non-hydrogen atoms                                  | 150,422                                               |                                              |
| Protein residues                                    | 6,001                                                 |                                              |
| RNA bases                                           | 4,883                                                 |                                              |
| <b>R.m.s. deviations</b>                            |                                                       |                                              |
| Bond lengths (Å)                                    | 0.006                                                 |                                              |
| Bond angles (°)                                     | 0.978                                                 |                                              |
| <b>Validation</b>                                   |                                                       |                                              |
| MolProbity score                                    | 1.33                                                  |                                              |
| Clash score                                         | 5.11                                                  |                                              |
| Rotamer outliers (%)                                | 0.15                                                  |                                              |
| <b>Ramachandran plot</b>                            |                                                       |                                              |
| Favored (%)                                         | 97.74                                                 |                                              |
| Allowed (%)                                         | 2.1                                                   |                                              |
| Disallowed (%)                                      | 0.15                                                  |                                              |
| <b>Validation RNA</b>                               |                                                       |                                              |
| Correct sugar pucker (%)                            | 99.18                                                 |                                              |
| Good backbone conf. (%)                             | 72.31                                                 |                                              |

**Supplementary Table 3. Data collection and refinement cryo-EM *E. coli* (*Ec*) datasets.**

|                                           | <i>(Ec)</i> SRP-RNC (pppGpp)<br>EMDB 13839 | <i>(Ec)</i> SRP-RNC (GMPPNP)<br>EMDB 13840 |
|-------------------------------------------|--------------------------------------------|--------------------------------------------|
| <b>Data collection</b>                    |                                            |                                            |
| Voltage (kV)                              |                                            | 300                                        |
| Electron exposure (e-/Å <sup>2</sup> )    |                                            | 40                                         |
| Defocus range (μm)                        |                                            | -0.5 to -4                                 |
| Pixel size (Å)                            |                                            | 1.09                                       |
| Symmetry imposed                          |                                            | C1                                         |
| <b>Refinement</b>                         |                                            |                                            |
| Particle images (no.)                     | 145,459                                    | 176,766                                    |
| Map resolution (Å)                        | 3.1                                        | 3.2                                        |
| FSC threshold                             | 0.143                                      | 0.143                                      |
| Map sharpening B factor (Å <sup>2</sup> ) | -30                                        | -30                                        |



**Supplementary Table 4.** Plasmids and primers used in this study.

| Plasmid                                 | Primer name          | sequence                                                       |
|-----------------------------------------|----------------------|----------------------------------------------------------------|
| <b>pNM101</b><br>(pET24d_EcFfh-<br>NG)  | <b>EcFfh fwd</b>     | TTAACCATGGGCTTTGATAATTTAACCGATCGTTTGTCG                        |
|                                         | <b>EcFfh rev 6H</b>  | TTAAACTCGAGTTTTAGATGGTGATGGTGATGGTGGCCGTCACCTT<br>TTTTCAGC     |
| <b>pNM103</b><br>(pET24d_EcFtsY-<br>NG) | <b>EcFtsY fwd</b>    | TTAACCATGGGCGGCCATCACCATCACCA                                  |
|                                         | <b>EcFtsY rev 6H</b> | TTAAACTCGAGTTTTAGATGGTGATGGTGATGGTGTCTCTCGGGC<br>AAAAAG        |
| <b>pLC163</b><br>(pET24d_BsFfh-<br>NG)  | <b>BsFfh fwd</b>     | TTAAGGTCTCCCATGGGCTTTGAAGGATTAGCCGACCGACTGC                    |
|                                         | <b>BsFfh rev</b>     | TTAAGGTCTCCTCGAGGTCGCCCATGCCGAGAATCC                           |
| <b>pLC164</b><br>(pET24d_BsFtsY-<br>NG) | <b>BsFtsY fwd</b>    | TTAAGGTCTCCCATGGGCAGCTTTTTTAAAAAATTTAAAAGAGAAA<br>ATCACAAAACAG |
|                                         | <b>BsFtsY rev</b>    | TTAAGGTCTCCTCGAGATCGTCGGCTTTTTTCCACTAAATC                      |
